# Supplementary material for: The STAT3 Target Mettl8 Regulates Mouse ESC Differentiation via Inhibiting the JNK Pathway
Source: PubMed Central journal article supplement — Stem Cell Reports. 2018 Apr 26;10(6):1807–20. doi: 10.1016/j.stemcr.2018.03.022 (PMC5989658; doi:10.1016/j.stemcr.2018.03.022), 2018-04-26
Supplement: mmc1.pdf [file mmc1.pdf]

**Stem Cell Reports, Volume 10**

**Supplemental Information**

**The STAT3 Target *Mettl8* Regulates Mouse ESC Differentiation via Inhibiting the JNK Pathway**

**Hao Gu, Dang Vinh Do, Xinyu Liu, Luang Xu, Yixun Su, Jie Min Nah, Yuqian Wong, Ying Li, Na Sheng, Gebreselassie Addisu Tilaye, Henry Yang, Huili Guo, Jun Yan, and Xin-Yuan Fu**

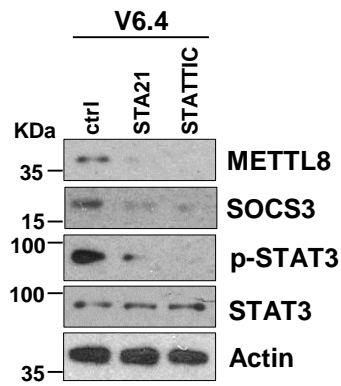

**Figure S1. *Mettl8* is transcriptionally regulated by STAT3. Related to Figure 1.**

V6.4 cells were treated with STA-21 and STATTIC for 6 hours and harvested. Then cell lysates were analysed by western blot.

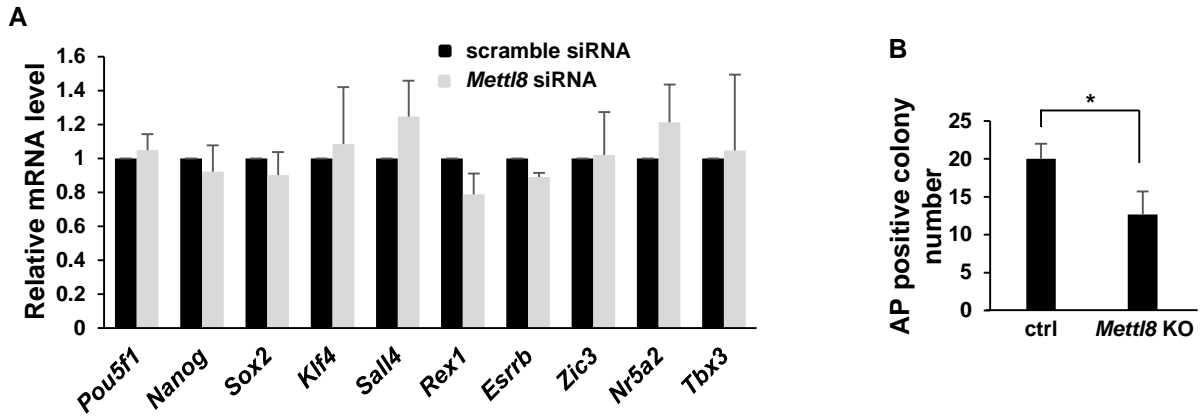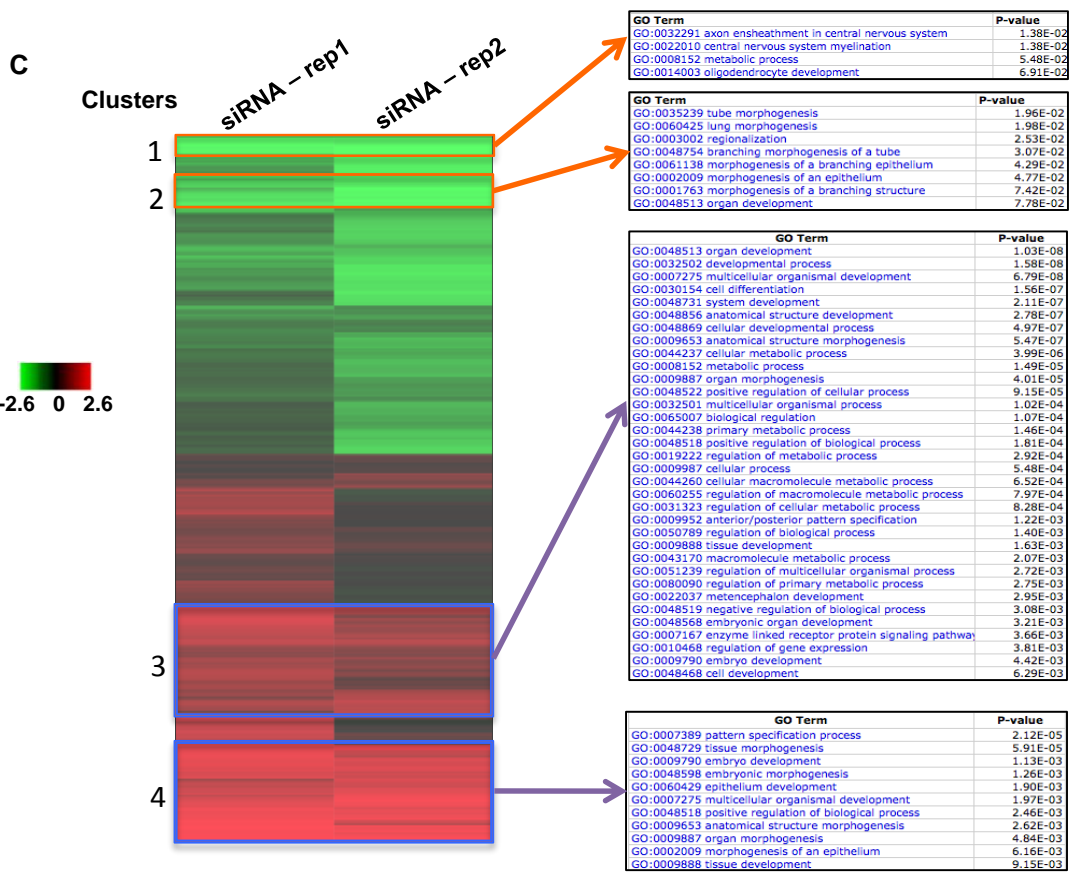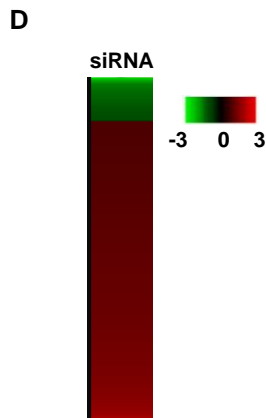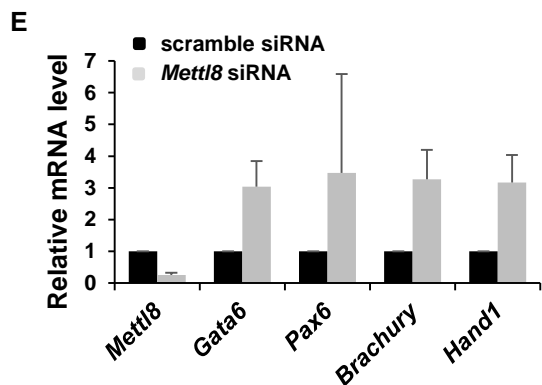

**Figure S2. METTL8 affects ESCs differentiation rather than pluripotency.  
Related to Figure 2.**

- (A) Quantitative RT-PCR analysis showed no significant change in expression of the key pluripotent genes.
- (B) *Mettl8* KO and control V6.4 cells were subjected to EB formation for 7 days. EBs were trypsinized and re-plated into gelatin-coated dishes. After 3 days culture in ES medium, colonies were stained for AP activity and AP positive colonies were counted. Data are shown as the mean  $\pm$  s.d. from 3 independent experiments. \* means  $P < 0.05$ .
- (C) Microarray profiling of gene expression changes in ES cells after knocking down *Mettl8* and  $\text{Log}_2$  transformed fold gene expression differences. siRNA-rep 1 and siRNA-rep 2 represents two independent comparisons of transcriptomes of mES cells treated with *Mettl8* siRNA compared to those treated with scramble siRNA control in two independent experiments.
- (D) RNA-seq analysis of gene expression changes in ES cells after knocking down *Mettl8*.  $\text{Log}_2$  transformed fold gene expression differences were subject to hierarchical clustering.
- (E) Five upregulated developmental genes from microarray and RNA-seq results are selected for validation by realtime-PCR. The transcript levels of all genes were normalized to *Gapdh* expression level.

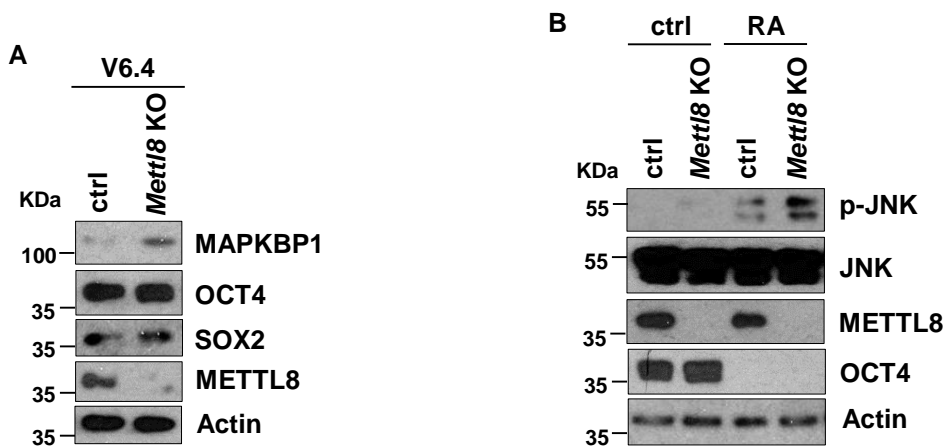

**Figure S3. METTL8 inhibits JNK signaling in V6.4 mESCs. Related to Figure 6.**

- (A) Cell lysates of *Mettl8* KO and control V6.4 cells were analysed by western blot.
- (B) *Mettl8* KO and control V6.4 cells were treated with RA for 6 days and cell lysates were analysed by western blot.

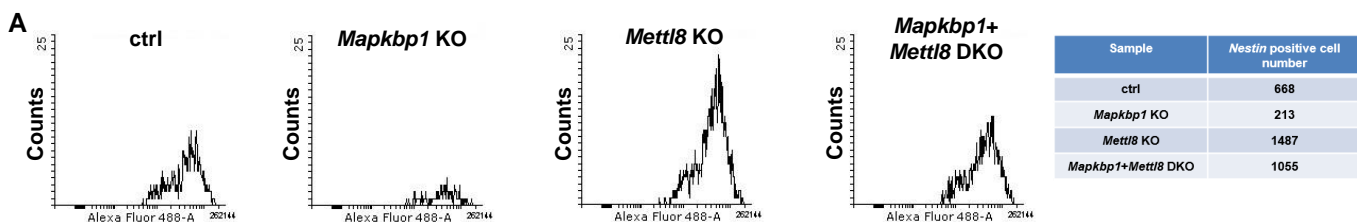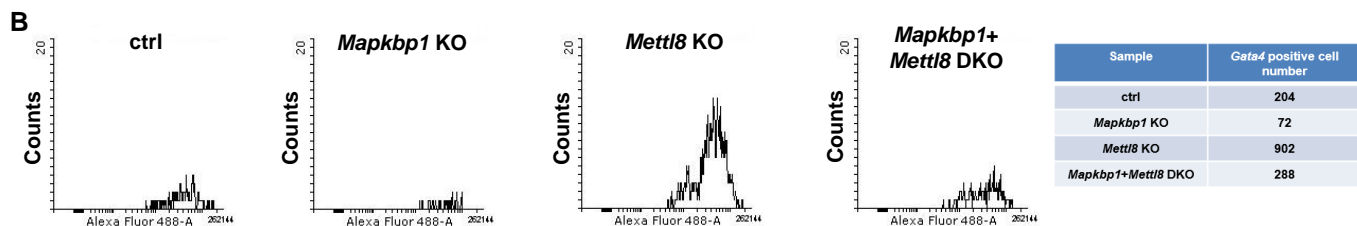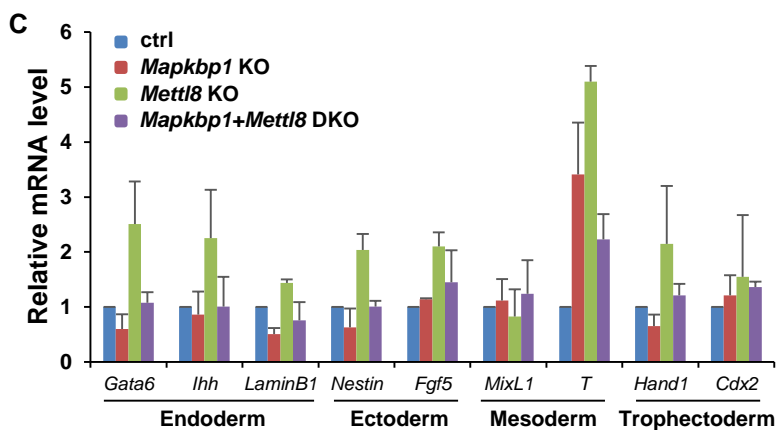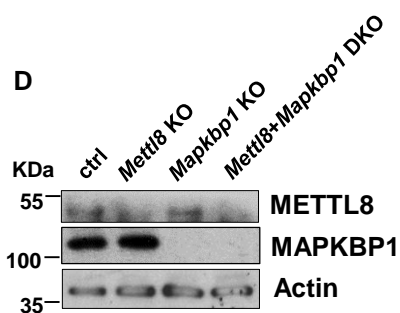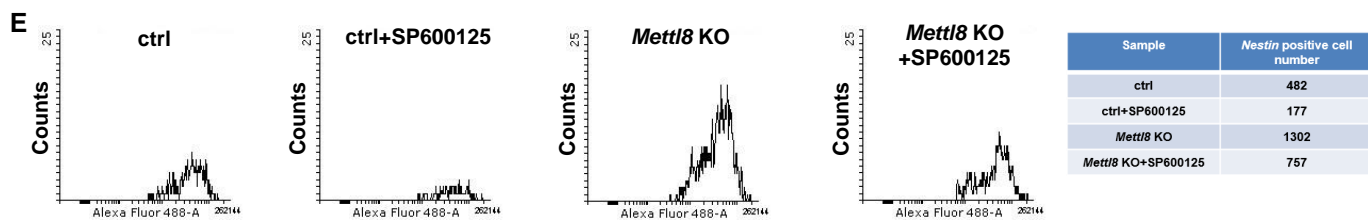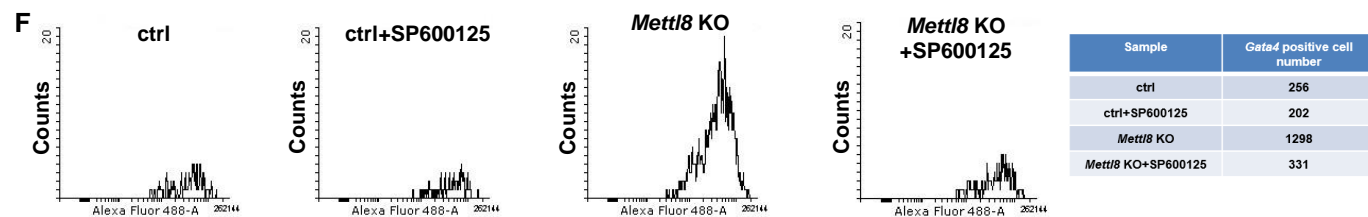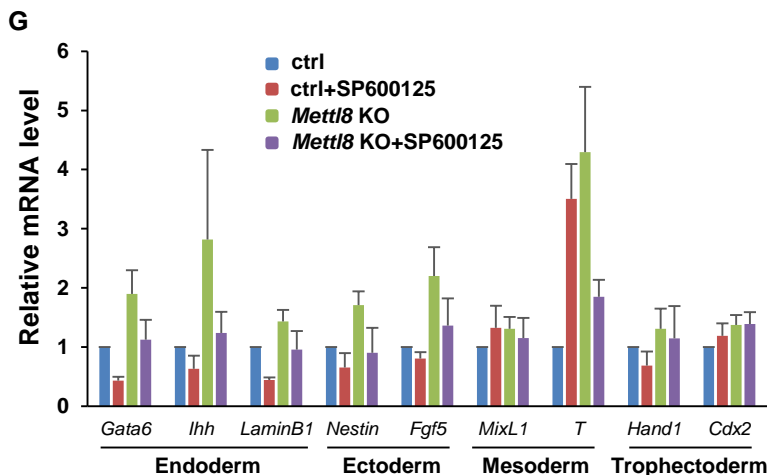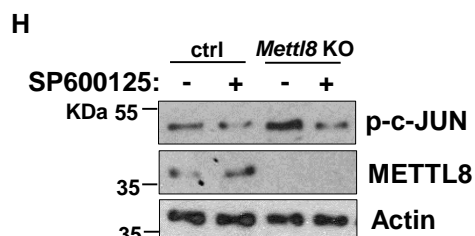

**Figure S4. The METTL8-JNK pathway in ESCs differentiation. Related to Figure 7.**

- (A) Re-confirm the number of Nestin positive cells by FACS. *Mettl8* KO, *Mapkbp1* KO, *Mettl8* and *Mapkbp1* DKO and control E14 cells were subjected to neuron progenitor cells differentiation. Cells were stained for expression of Nestin and half of cells from one 12-well plate were analysed by FACS.
- (B) Re-confirm the number of Gata4 positive cells by FACS. *Mettl8* KO, *Mapkbp1* KO, *Mettl8* and *Mapkbp1* DKO and control E14 cells were subjected to cardiac differentiation. Cells were stained for expression of Gata4 and 10% cells from one 12-well plate were analysed by FACS.
- (C-D) *Mettl8* KO, *Mapkbp1* KO, *Mettl8* and *Mapkbp1* DKO and control E14 cells were subjected to EB formation. Fourteen days later, (C) total RNAs were extracted and RNA levels of lineage markers were analysed by RT-PCR. Data are shown as the mean  $\pm$  s.d. from 3 independent experiments. (D) Cell lysates were analysed by western blot.
- (E) Re-confirm the number of Nestin positive cells by FACS. *Mettl8* KO and control E14 cells were treated with or without SP600125 and subjected to neuron progenitor cells differentiation. Cells were stained for expression of Nestin and half of cells from one 12-well plate were analysed by FACS.
- (F) Re-confirm the number of Gata4 positive cells by FACS. *Mettl8* KO and control E14 cells were treated with or without SP600125 and subjected to cardiac differentiation. Cells were stained for expression of Gata4 and 10% cells from one 12-well plate were analysed by FACS.
- (G-H) *Mettl8* KO and control E14 cells were treated with or without SP600125 and subjected to EB formation. Fourteen days later, (G) total RNAs were extracted and RNA levels of lineage markers were analysed by RT-PCR. Data are shown as the mean  $\pm$  s.d. from 3 independent experiments. (H) Cell lysates were analysed by western blot.

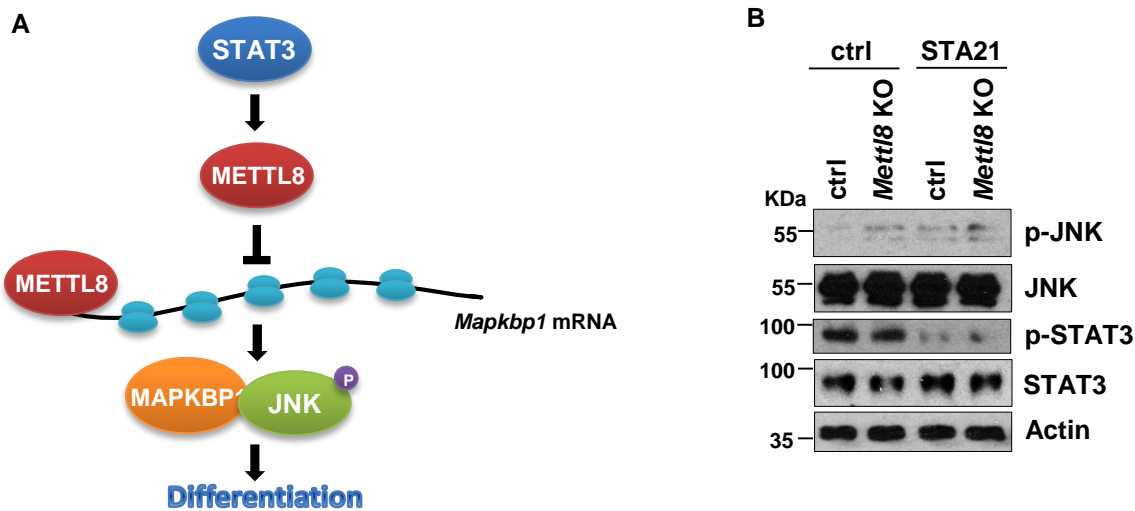

**Figure S5. The STAT3-METTL8-JNK pathway in mouse ESCs**

- (A) A proposed model illustrating the role of the STAT3-METTL8-MAPKBP1-JNK pathway in mouse ESCs.
- (B) Control and *Mettl8* KO E14 cells were treated RA for 4 days. Then cells were treated with or without STA21 for 12 hours and cell lysates were analysed by western blot.



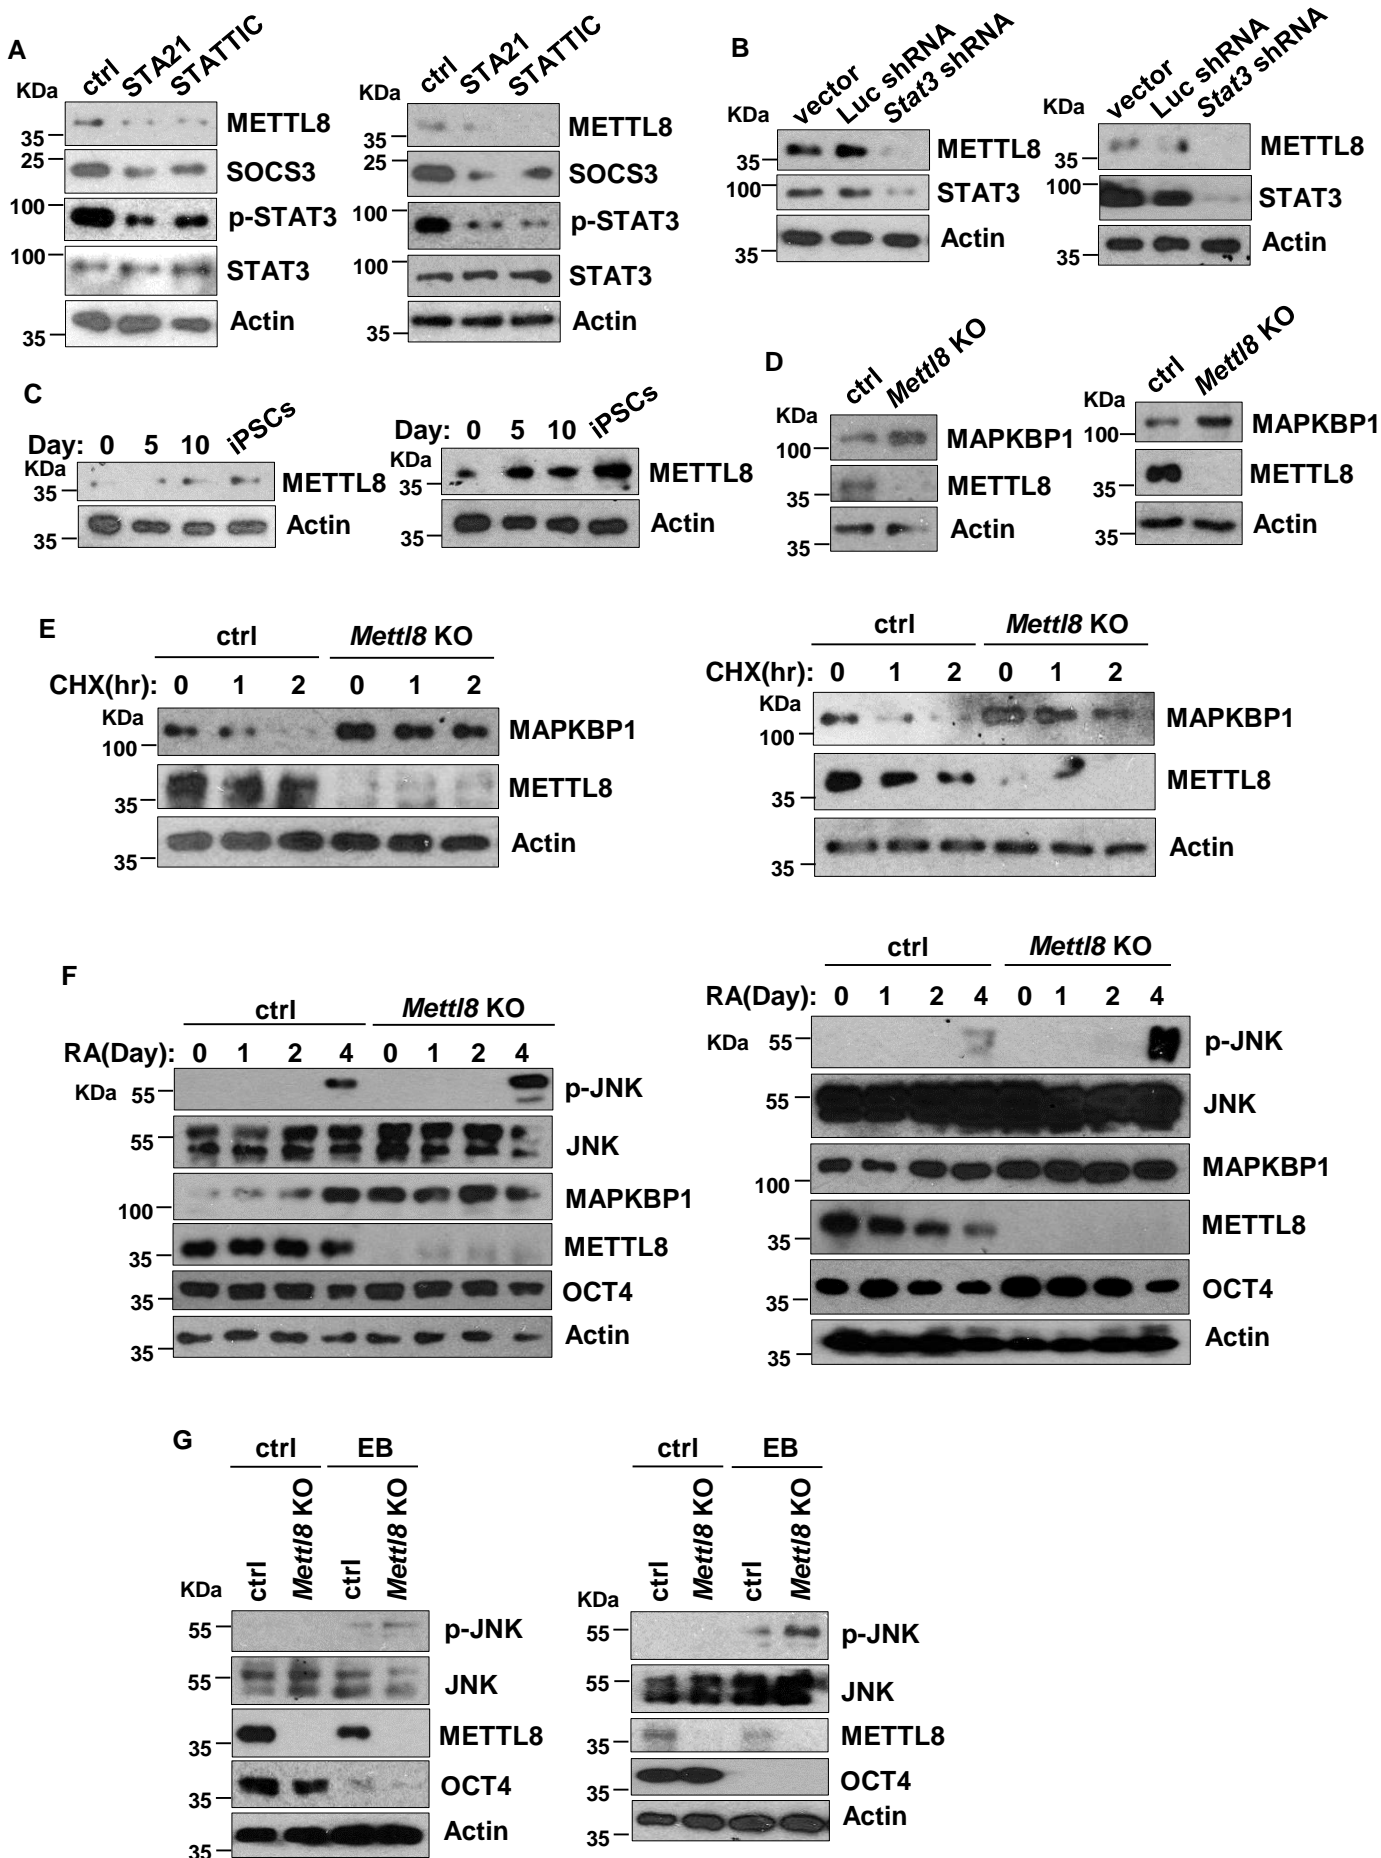

**Figure S6. Replicates of western blot quantifications**

- (A) Replicates of Fig.1C
- (B) Replicates of Fig.1E
- (C) Replicates of Fig.3B
- (D) Replicates of Fig.5C
- (E) Replicates of Fig.5D
- (F) Replicates of Fig.6B
- (G) Replicates of Fig.6C

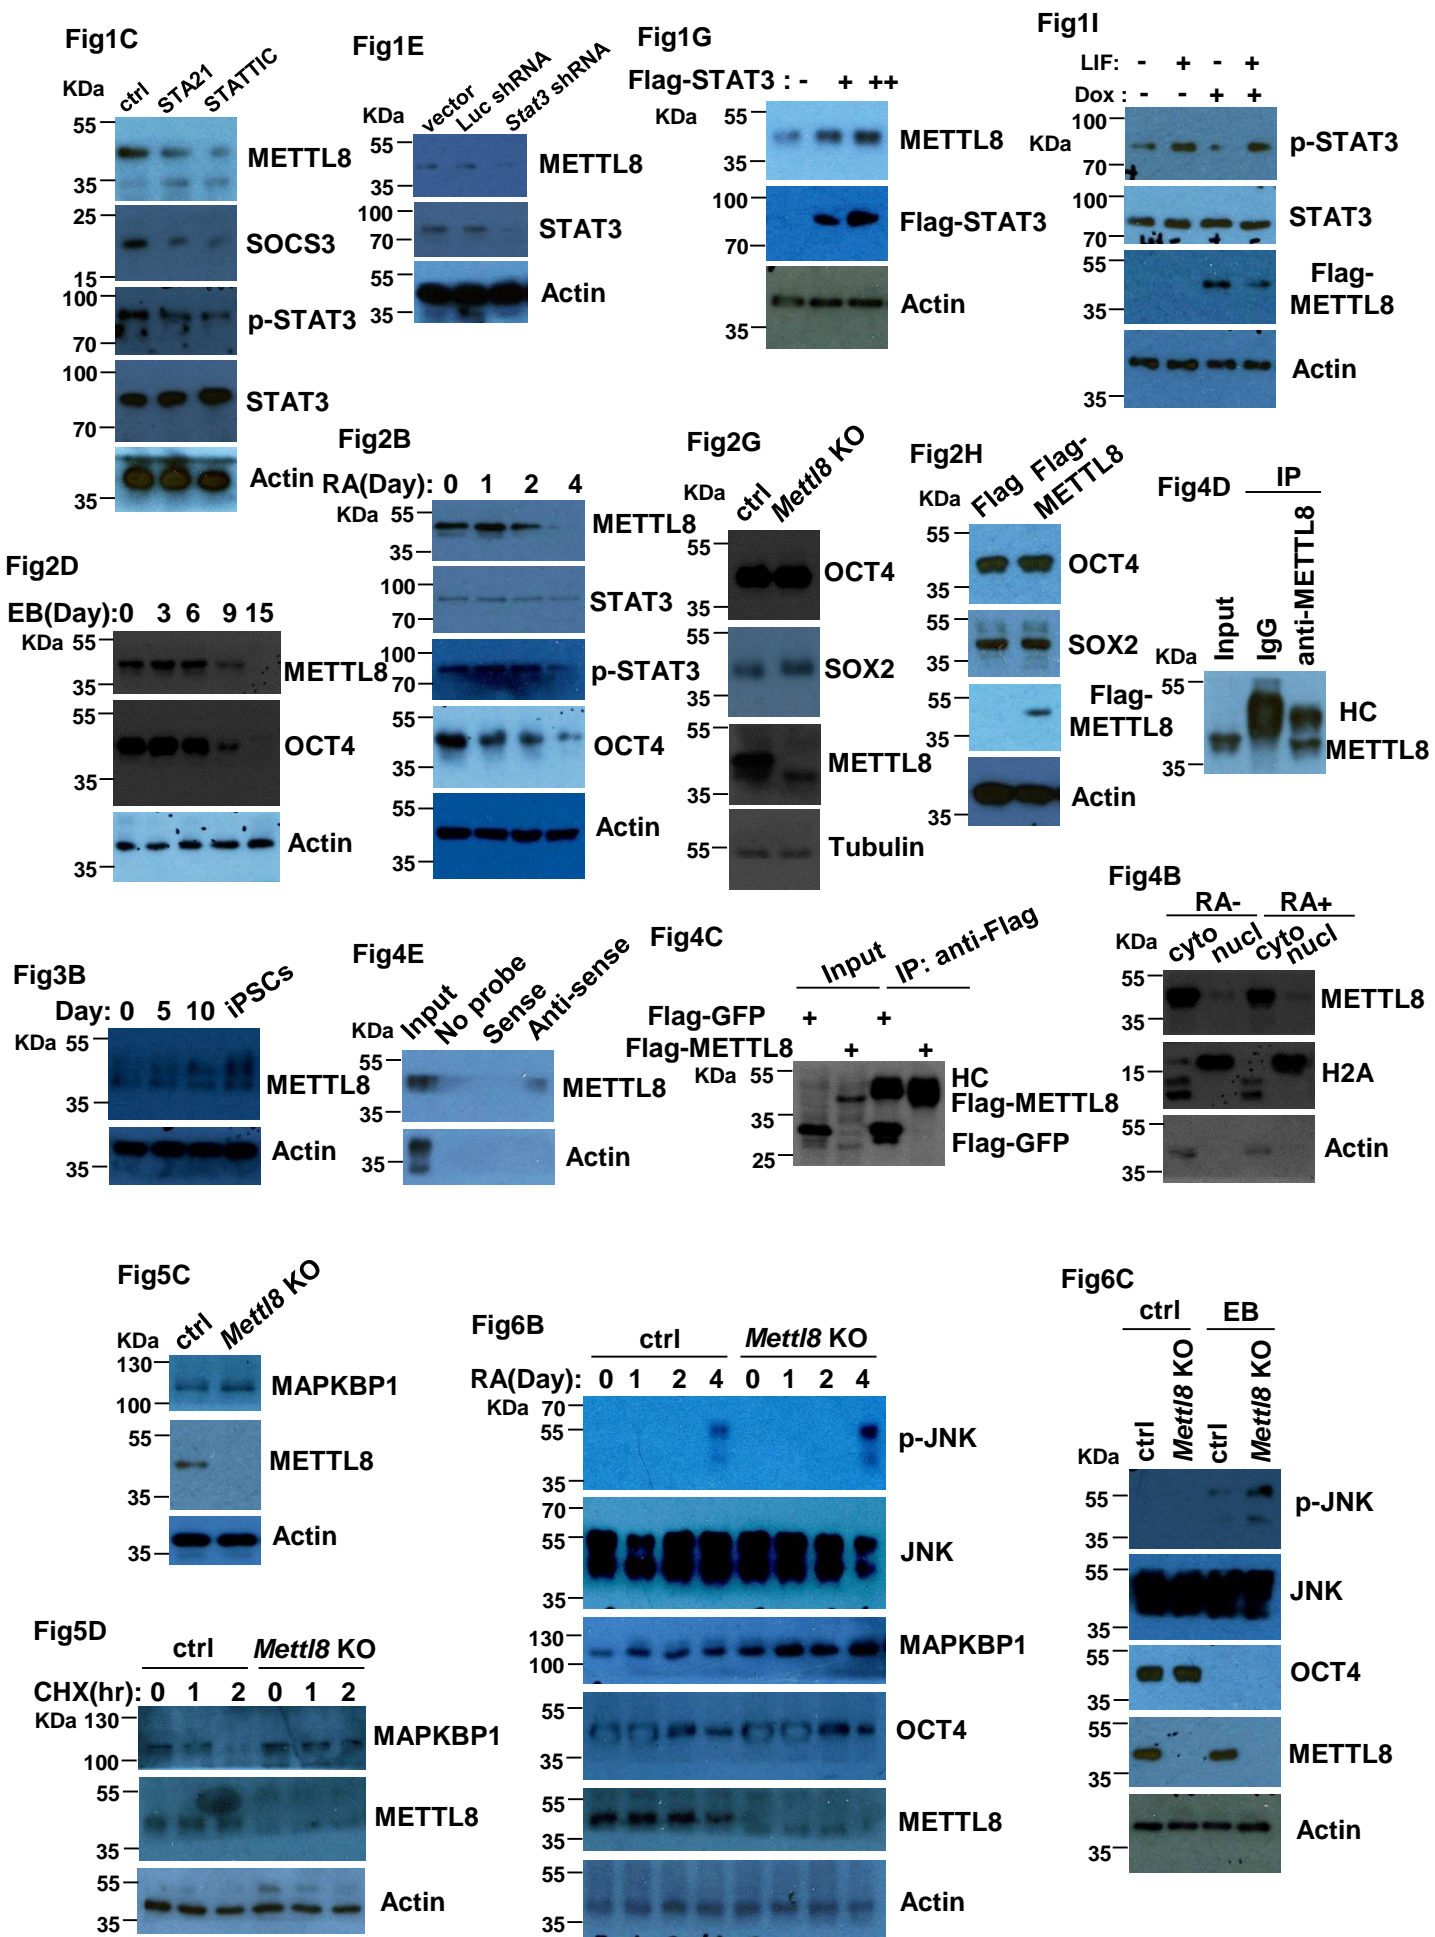

Fig6D

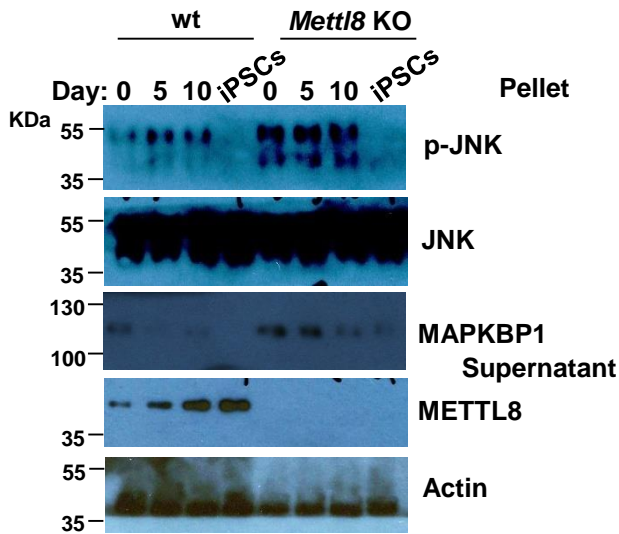

Fig6E

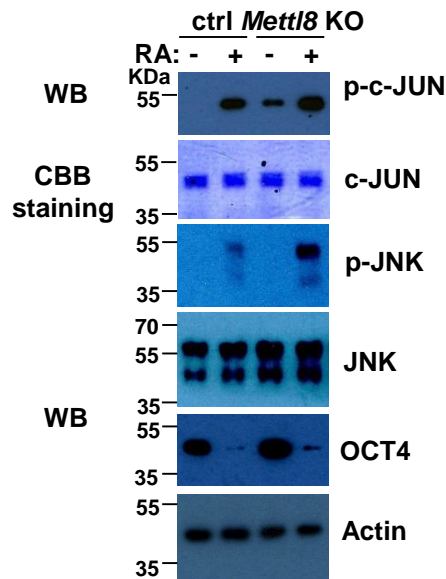

FigS1A

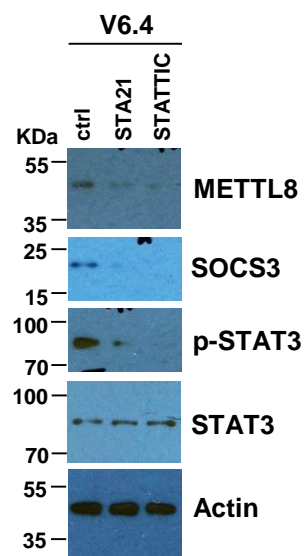

FigS3A

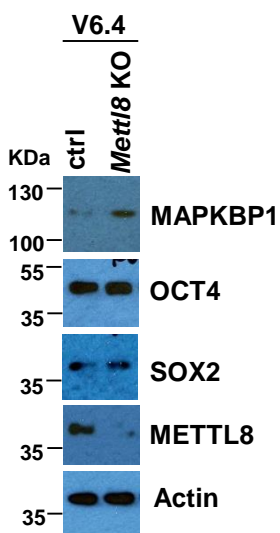

FigS3B

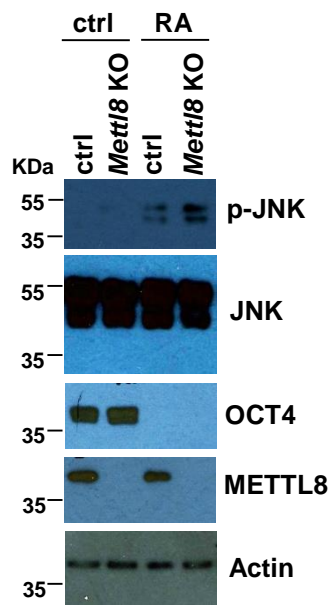

FigS4F

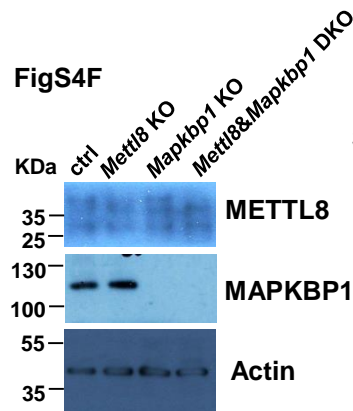

FigS4H

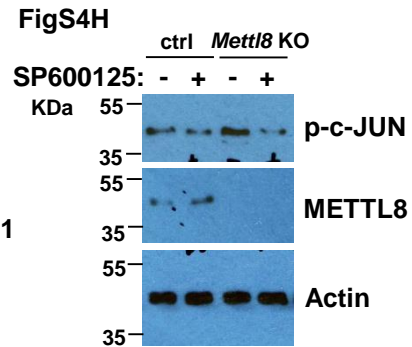

FigS5A

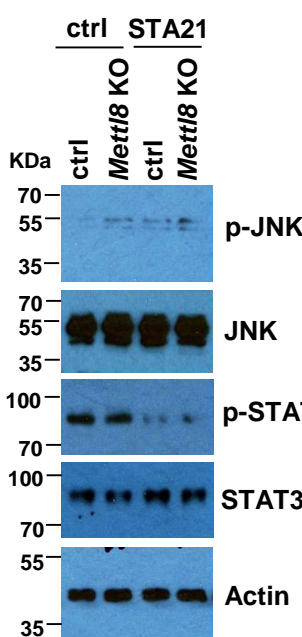

FigS6A

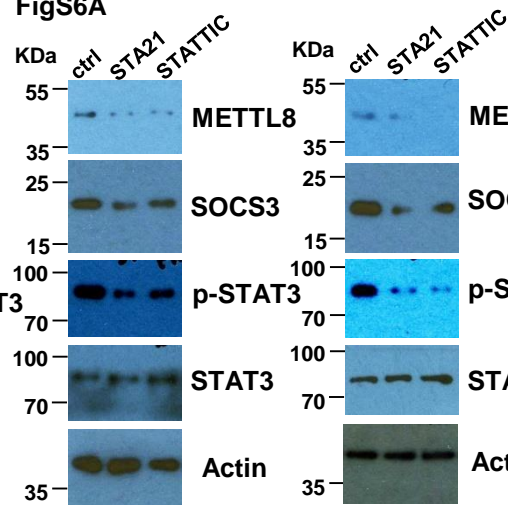

FigS6C

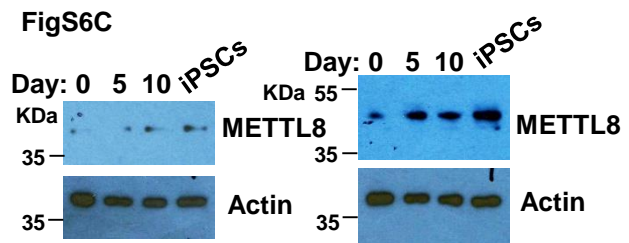

FigS6B

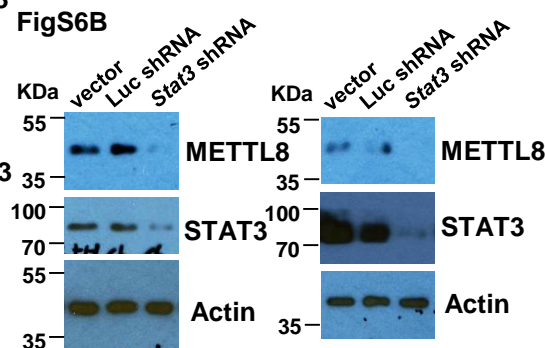

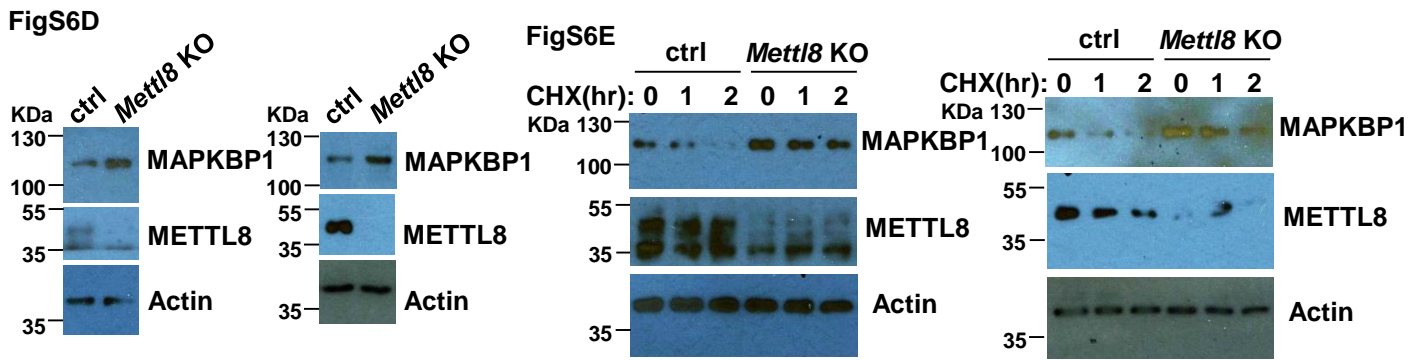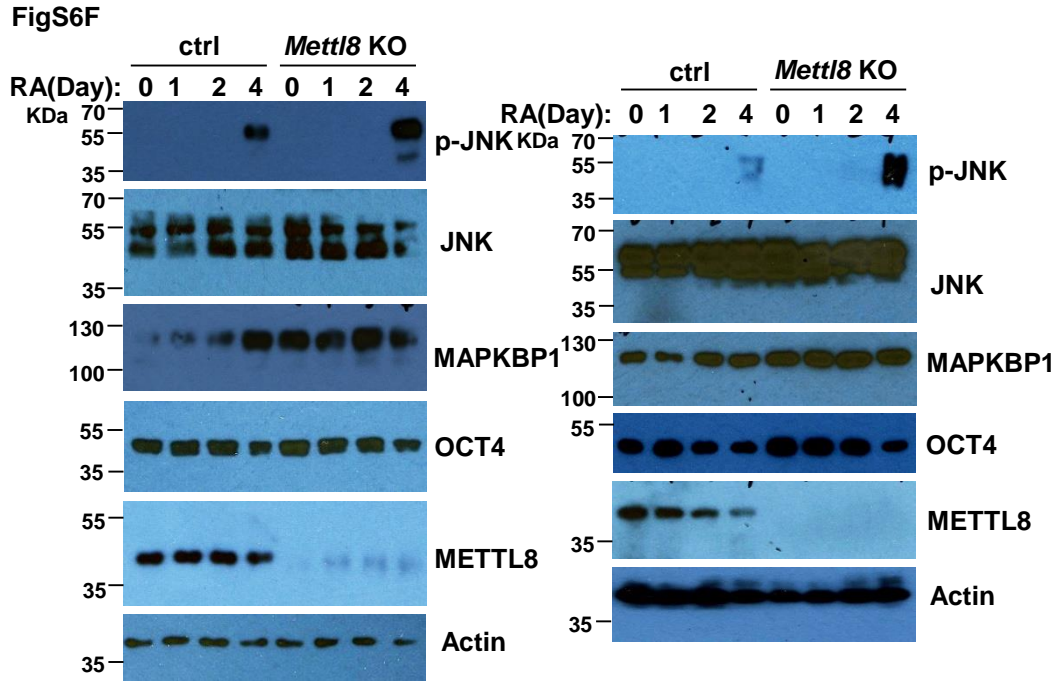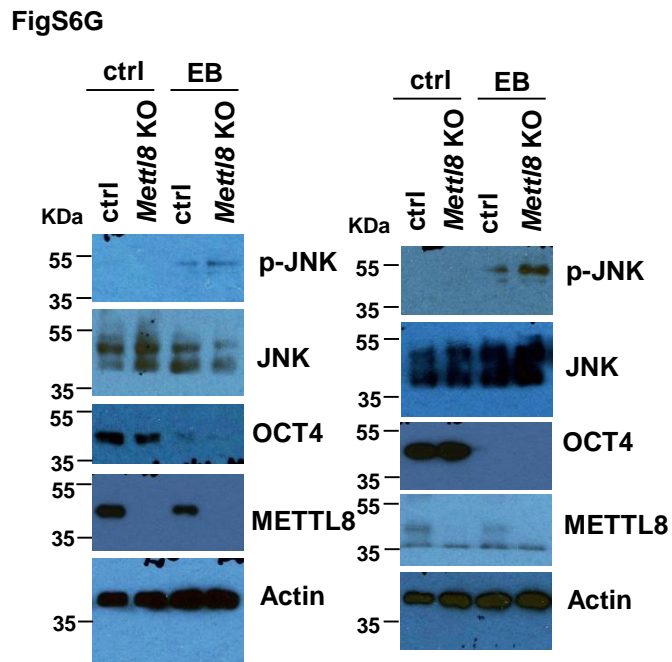

Figure S7. Uncropped images of Western blot

**Table S4. List of primers sequences**

| <b>Primers for qRT-PCR</b> |                                       |
|----------------------------|---------------------------------------|
| <b>Gene</b>                | <b>Sequence (5'-3')</b>               |
| <i>Actin</i>               | Fw: CTGTCCCTGTATGCCTCTG               |
|                            | Rev: ATGTCACGCACGATTTCC               |
| <i>Oct4</i>                | Fw: TCTTTCCACCAGGCCCCCGGCTC           |
|                            | Rev: TGCGGGCGGACATGGGGAGATCC          |
| <i>Sox2</i>                | Fw: TAGAGCTAGACTCCGGGCGATGA           |
|                            | Rev: TTGCCTTAAACAAGACCACGAAA          |
| <i>Nanog</i>               | Fw: CTCATCAATGCCTGCAGTTTTTCA          |
|                            | Rev: CTCCTCAGGGCCCTTGTCTCAGC          |
| <i>Rex1</i>                | Fw: ACGAGGTGAGTTTTCCGAAC              |
|                            | Rev: CCTCTGTCTTCTCTTGCTTC             |
| <i>Esg1</i>                | Fw: ATATCCCGCCGTGGGTGAAAGTTC          |
|                            | Rev: ACTCAGCCATGGACTGGAGCATCC         |
| <i>Fbx15</i>               | Fw: GTTGAATCTGCTTCTACAG               |
|                            | Rev: CTTACCAAGATTTCCGATG              |
| <i>Cdx2</i>                | Fw: CGAGCCCTTGAGTCCTGTGA              |
|                            | Rev: AACCCAGGGACAGAACCA               |
| <i>Hand1</i>               | Fw: GCCAAGGATGCACAAGCA                |
|                            | Rev: GGGCTGCTGAGGCAACTC               |
| <i>Gata6</i>               | Fw: CTTGCGGGCTCTATATGAAACTCCAT        |
|                            | Rev: TAGAAGAAGAGGAAGTAGGAGTCATAGGGACA |
| <i>Ihh</i>                 | Fw: ACGTGCATTGCTCTGTCAAGT             |
|                            | Rev: CTGGAAAGCTCTCAGCCGGTT            |
| <i>Laminin B1</i>          | Fw: CCCCAATCTCTGTGAACCATG             |
|                            | Rev: GCAATTTGCACCGACACTGA             |
| <i>Fgf5</i>                | Fw: TCGTCCGCGATCCA                    |
|                            | Rev: TCAGGGCCACGTACCACTCT             |
| <i>Nestin</i>              | Fw: TGAGGGTCAGGTGGTTCTG               |
|                            | Rev: AGAGCAGGGAGGGACATTC              |
| <i>Pax6</i>                | Fw: GCATGCAGAACAGTCACAGCGGA           |
|                            | Rev: ACTCCCGTTTATACTGGGCTATTT         |
| <i>T</i>                   | Fw: ATCACCAGCCACTGCTTTC               |
|                            | Rev: CCATTACATCTTTGTGGTCGTTTC         |
| <i>Mixl1</i>               | Fw: ACTTTCCAGCTCTTTCAAGAGCC           |
|                            | Rev: ATTGTGTA CTCCCAACTTTCCC          |
| <i>Mapkbp1</i>             | FW: TCCTGACCGTCCTACTCTGA              |
|                            | REV: TTTCTAGGCTCACCAAGGG              |
| <i>Mettl8</i>              | FW: CCACCCAGGAAGAGTCTCAG              |
|                            | REV: GGTTACACCCATGGTCAGGA             |
| <b>Primers for CRISPR</b>  |                                       |
| <b>Name</b>                | <b>Sequence (5'-3')</b>               |
| Mapkbp1 1                  | FW: caccgCGTTGACAATCATGTCATGC         |
|                            | REV: aaacGCATGACATGATTGTCAACGc        |
| Mapkbp1 2                  | FW: caccgCTTGCTTGTGACCCCGATC          |
|                            | REV: aaacGATCGGGGGTCAACAAGCAAGc       |
| Mettl8 1                   | FW: caccgGAAGTTGCATTTGCCGACTG         |
|                            | REV: aaacCAGTCGGCAAATGCAACTTCCc       |
| Mettl8 2                   | FW: caccgTTGCATTTGCCGACTGAGGC         |
|                            | REV: aaacGCCTCAGTCGGCAAATGCAAc        |

| <b>Biotin labelled probes for Mapkbp1 mRNA pull down</b> |                                 |
|----------------------------------------------------------|---------------------------------|
| <b>Name</b>                                              | <b>Sequence (5'-3')</b>         |
| Probe1                                                   | Sense: TTCTGTATCACGTCGTCTGGG    |
|                                                          | Antisense: CCCGACGTGATACAGAA    |
| Probe2                                                   | Sense: TGCAAGAGAGCCCTAGTGTT     |
|                                                          | Antisense: AACACTAGGGCTCTCTTGCA |
